# Supplementary material for: Synthesis of renewable C–C cyclic oxygenated compounds dedicated for high-density biofuels from biomass-derived cyclopentanone
Source: Royal Society of Chemistry journal article supplement (doi:10.1039/d2nj06183j), 2023-01-01
Supplement: d2nj06183j1.pdf [file d2nj06183j1.pdf]

## Supporting Information

### **Synthesis of renewable C-C cyclic oxygenated compounds dedicated for high-density biofuels from biomass-derived cyclopentanone**

Li Bai <sup>a,b,1</sup>, Lulu Chen <sup>a,e,1</sup>, Mei Wu <sup>a,b</sup>, Ke Song <sup>a,b,c</sup>, Xianwu Zhou <sup>a,b,c</sup>, Jie Guo <sup>a,b,c</sup>,  
Hu Pan <sup>d</sup>, Shima Liu <sup>a,b,c,\*</sup>, Jian He <sup>a,b,c,\*</sup>

<sup>a</sup> Key Laboratory of Hunan Forest Products and Chemical Industry Engineering, Jishou University, Zhangjiajie, 427000, PR China.

<sup>b</sup> College of Chemistry and Chemical Engineering, Jishou University, Jishou, 416000, PR China.

<sup>c</sup> National and Local United Engineering Laboratory of Integrative Utilization Technology of *Eucommia Ulmoides*, Jishou University, Jishou, 416000, PR China

<sup>d</sup> College of Biological, Chemical Science and Engineering, Jiaying University, Jiaying, Zhejiang 314001, China.

<sup>e</sup> SINO-SINA Building Materials Co.,Ltd, Zhengzhou, Henan, 450000, PR China.

<sup>1</sup> The authors contributed equally (Li Bai and Lulu Chen).

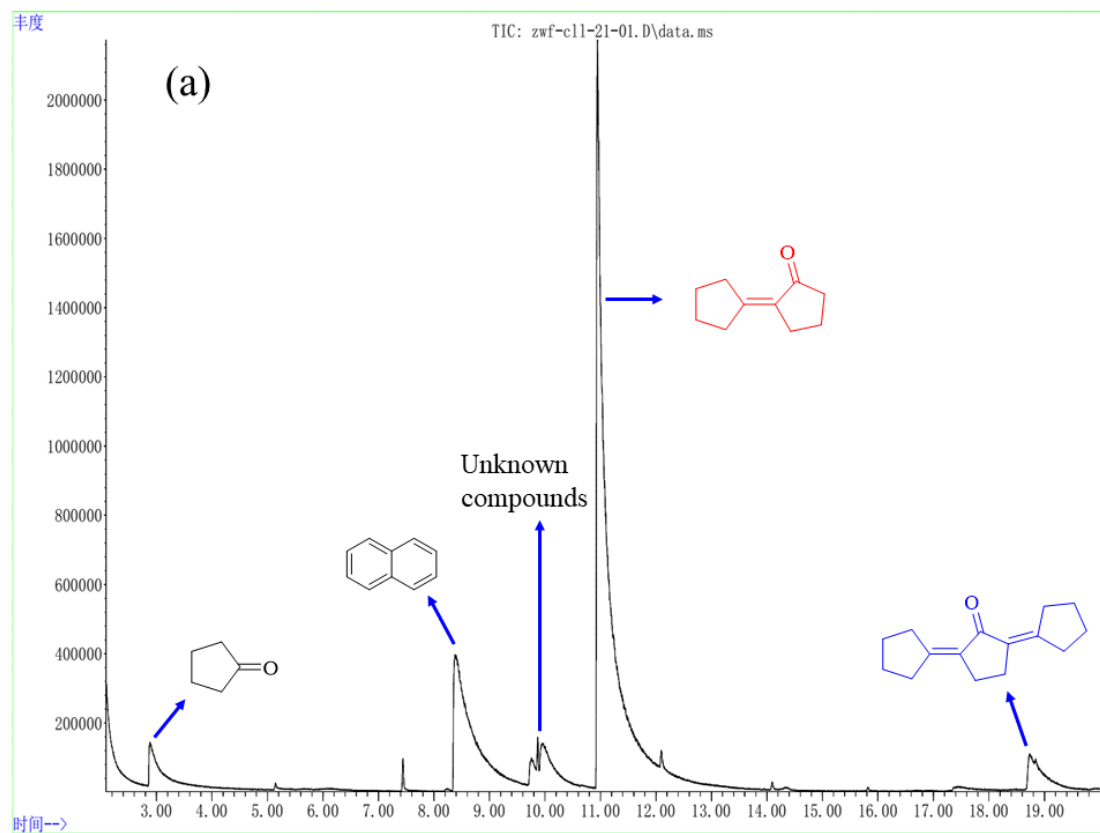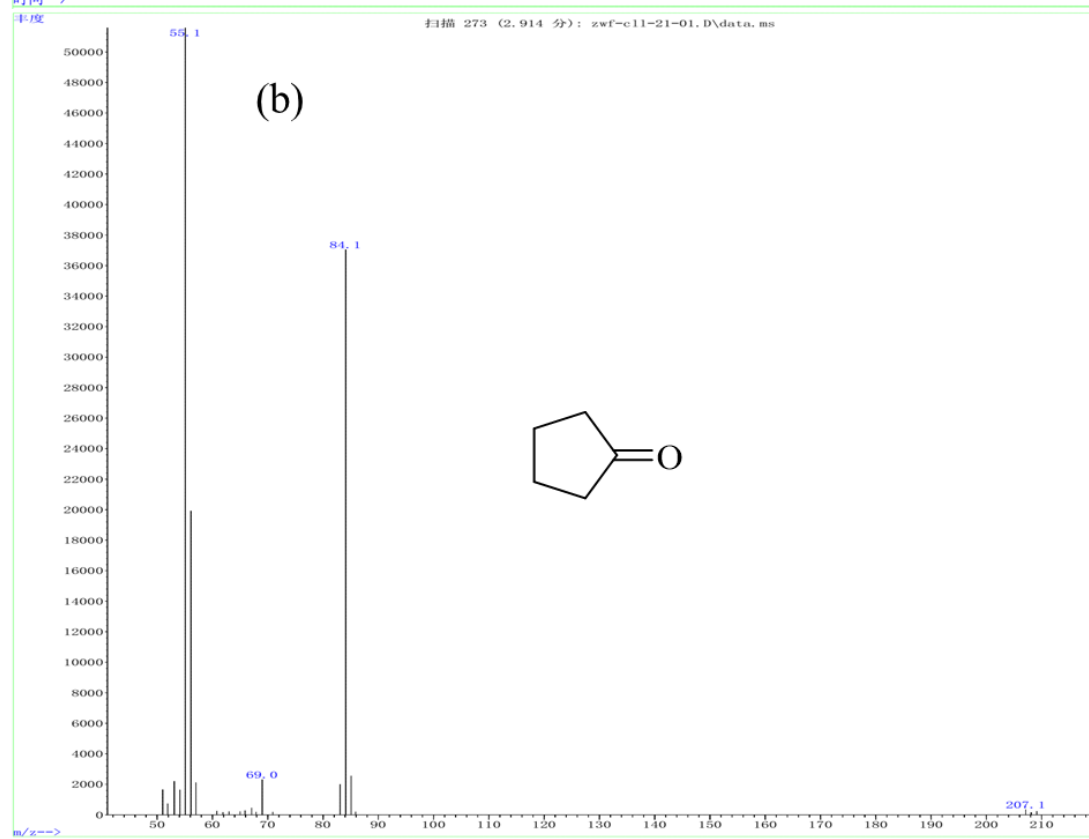

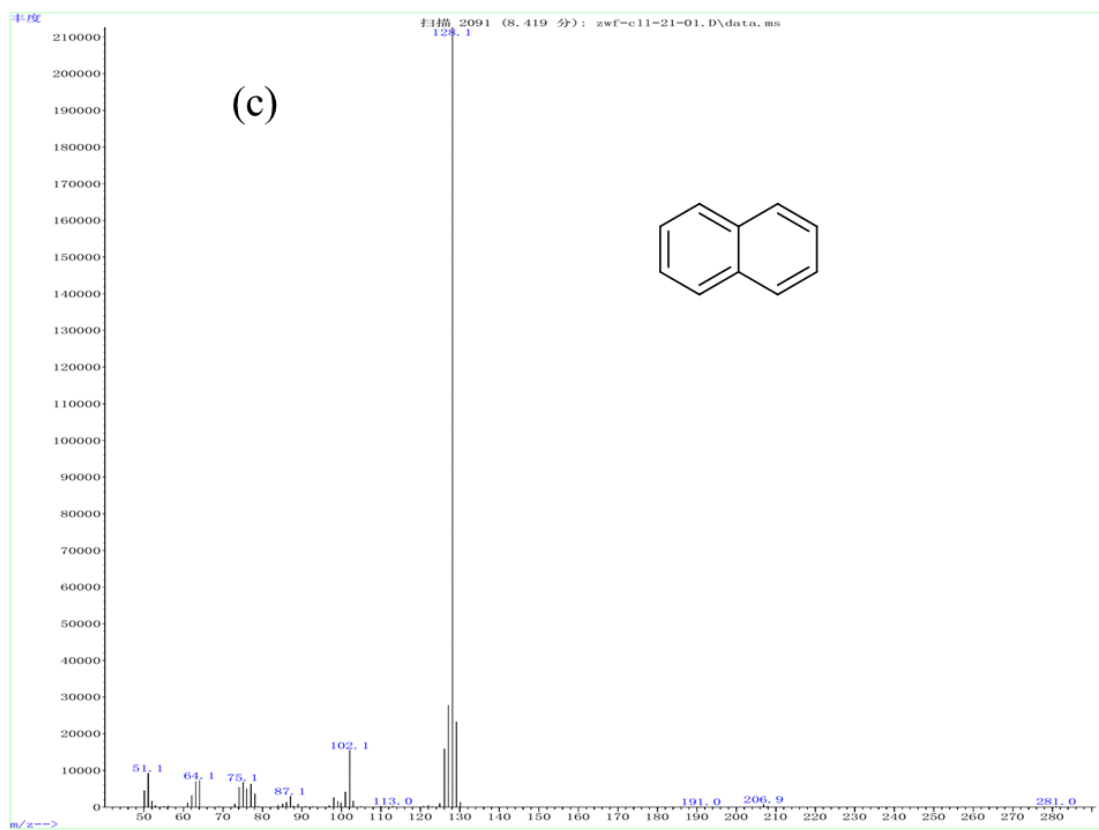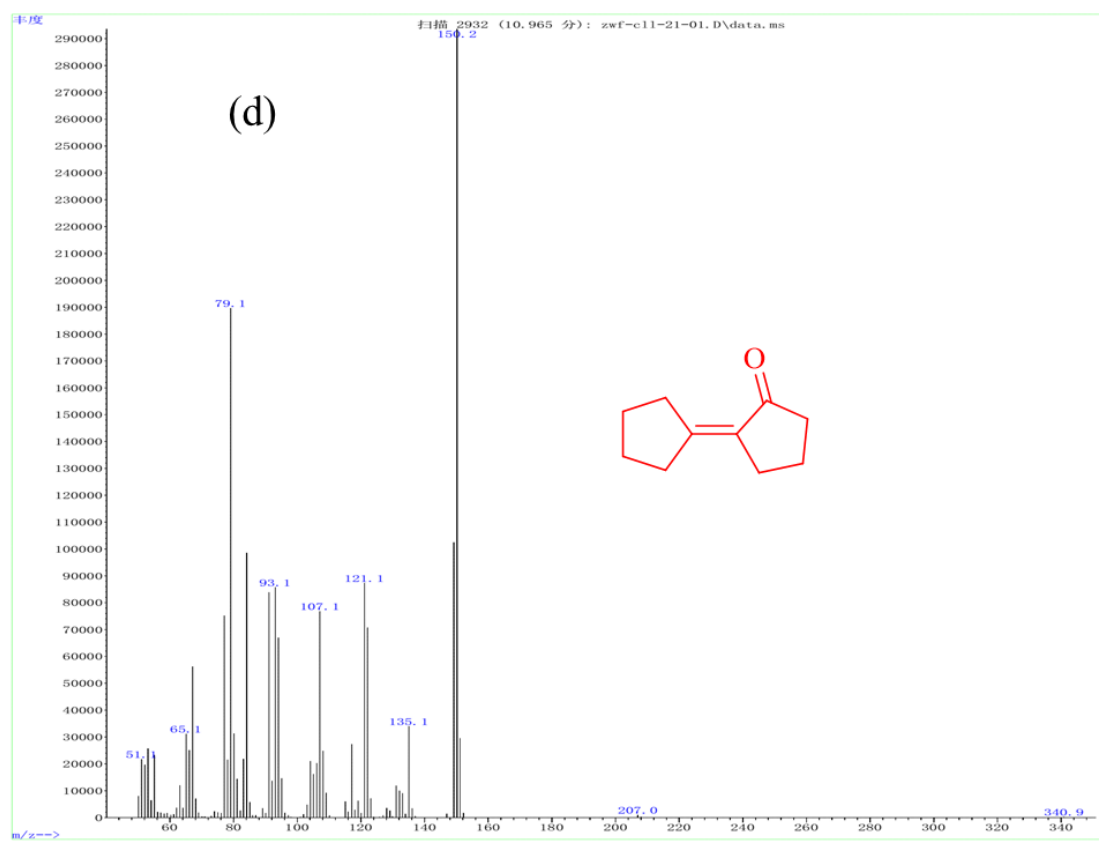

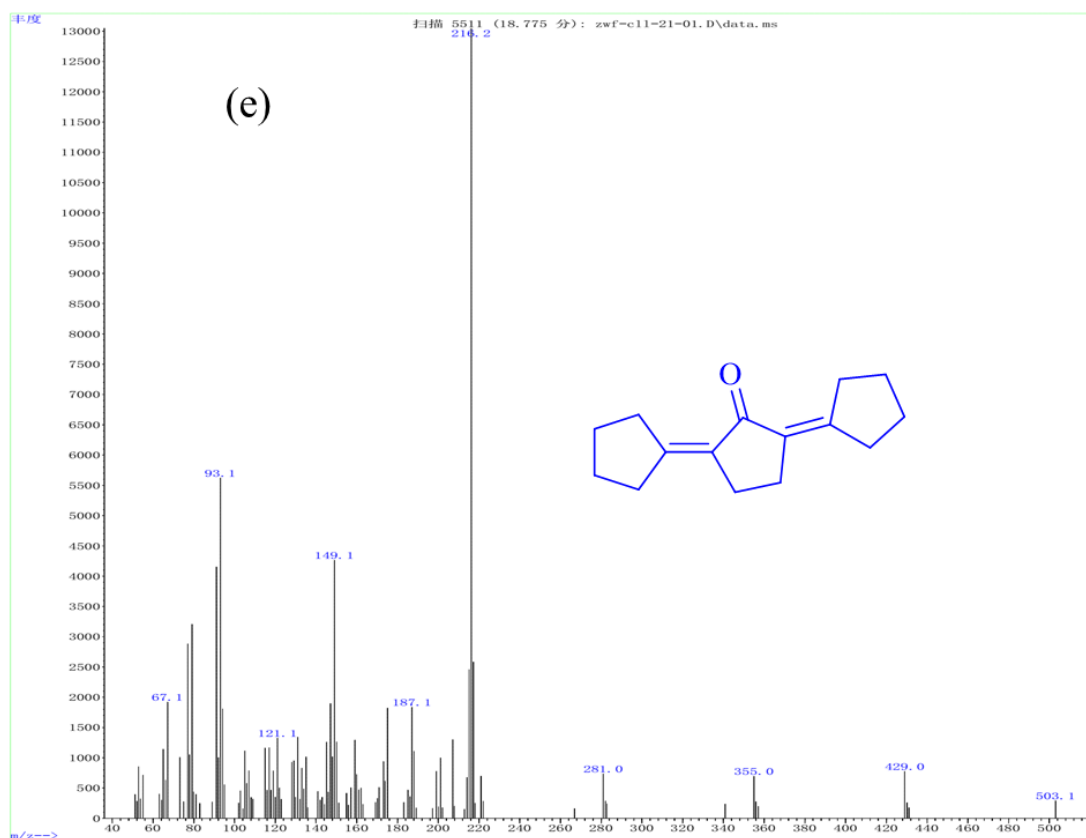

**Figure S1** GC chromatograms of reaction mixture (from GC-MS) catalyzed by  $4\text{MgCO}_3 \cdot \text{Mg}(\text{OH})_2 \cdot 4\text{H}_2\text{O}$  at  $180\text{ }^\circ\text{C}$ .

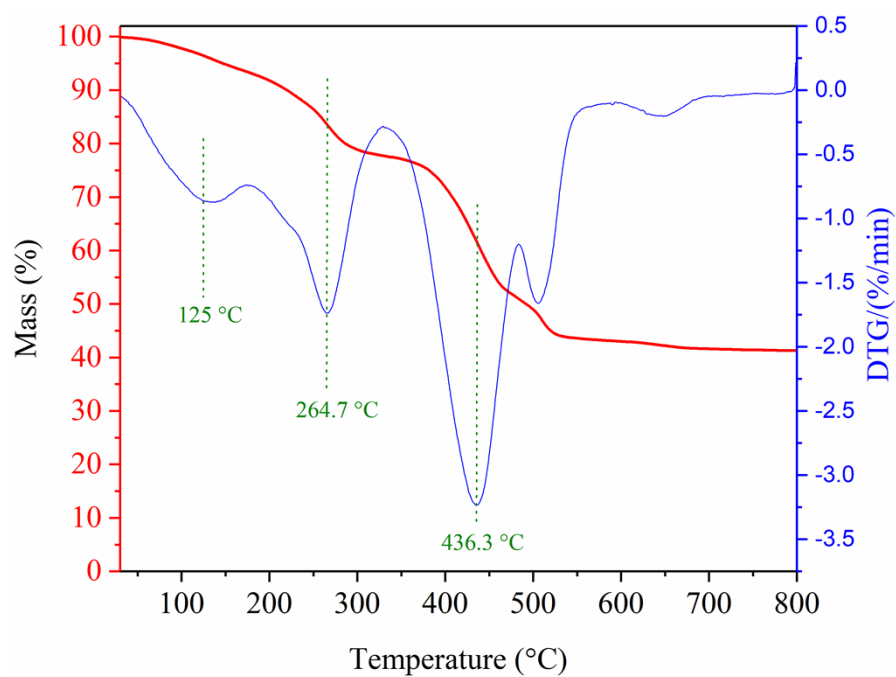

**Figure S2** TGA and DTG curves of  $4\text{MgCO}_3 \cdot \text{Mg}(\text{OH})_2 \cdot 4\text{H}_2\text{O}$  catalyst

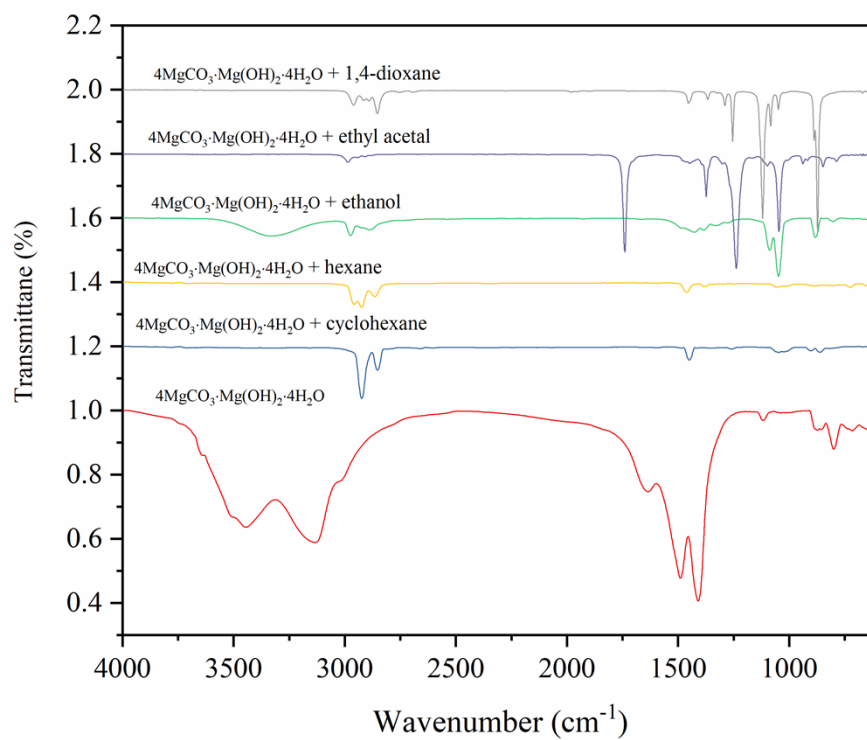

**Figure S3** FT-IR spectra of basic magnesium carbonate/reaction solvents

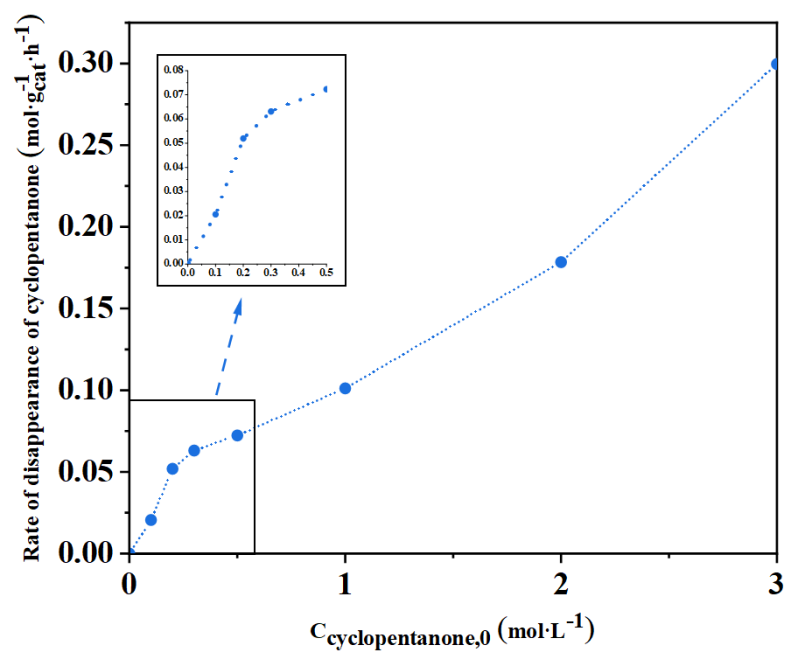

**Figure S4** Initial rates of cyclopentanone conversion over  $4\text{MgCO}_3\cdot\text{Mg}(\text{OH})_2\cdot 4\text{H}_2\text{O}$  catalyst as a plot of initial cyclopentanone concentration. Reaction condition: 0.05 g  $4\text{MgCO}_3\cdot\text{Mg}(\text{OH})_2\cdot 4\text{H}_2\text{O}$ , 10 mL of total liquid volume, 120 °C and 0.5 h

**Table S1** Linearization of cyclopentanone self-condensation initial rates derived from Langmuir-Hinshelwood and Eley-Rideal reaction models

| Model                              | Initial rate expression                                                            | Linearized function                                                                                   |
|------------------------------------|------------------------------------------------------------------------------------|-------------------------------------------------------------------------------------------------------|
| Langmuir-Hinshelwood Deprotonation | $r = k_{DP} \frac{K_{ads}C}{1 + K_{ads}C}$                                         | $\frac{1}{r} = \frac{1}{k_{DP}K_{ads}C} + \frac{1}{k_{DP}}$                                           |
| Langmuir-Hinshelwood C-C coupling  | $r = k_{LH}K_{DP} \left( \frac{K_{ads}C}{1 + K_{ads}C + K_{ads}K_{DP}C} \right)^2$ | $\frac{1}{\sqrt{r}} = \frac{1}{K_{ads}\sqrt{k_{LH}K_{DP}}C} + \frac{1 + k_{DP}}{\sqrt{k_{LH}K_{DP}}}$ |
| Eley-Rideal C-C coupling           | $r = k_{ER}K_{DP} \frac{K_{ads}C}{1 + K_{ads}C + K_{ads}K_{DP}C} C$                | $\frac{C^2}{r} = \frac{1 + K_{DP}}{k_{ER}K_{DP}} C + \frac{1}{k_{ER}K_{DP}K_{ads}}$                   |

\*  $k_{DP}$ ,  $k_{LH}$ , and  $k_{ER}$  are the rate constants of the different kinetic models;  $K_{ads}$  is the adsorption constant of cyclopentanone;  $K_{DP}$  is the equilibrium constant for deprotonation; and C is the initial concentration of the cyclopentanone.



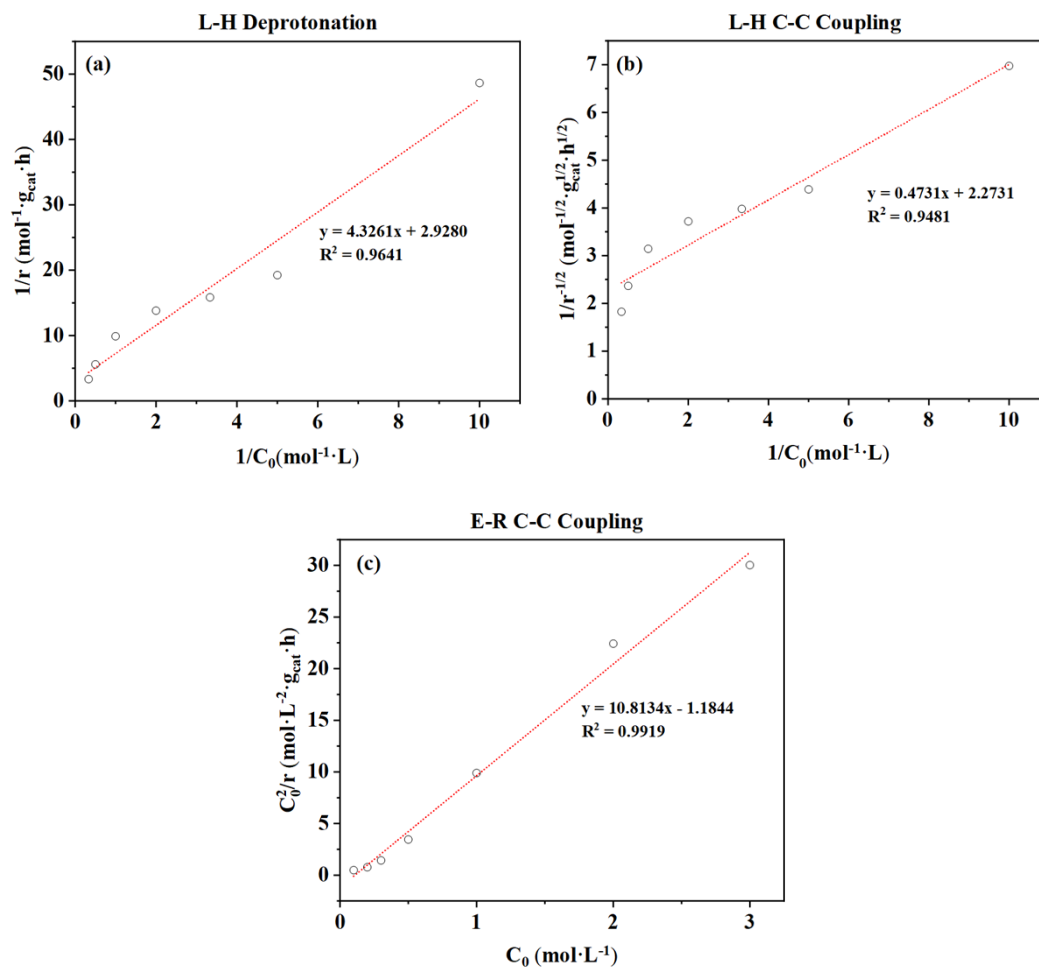

**Figure S5** Linearization of initial rates over 4MgCO<sub>3</sub>·Mg(OH)<sub>2</sub>·4H<sub>2</sub>O. Reaction condition: 0.05 g 4MgCO<sub>3</sub>·Mg(OH)<sub>2</sub>·4H<sub>2</sub>O, 10 mL of total liquid volume, 120 °C and 0.5 h
